# Supplementary material
Source: PubMed Central journal article supplement (PMC5685804)
Supplement: NIHMS916127-supplement-supplement_1.pdf [file NIHMS916127-supplement-supplement_1.pdf]

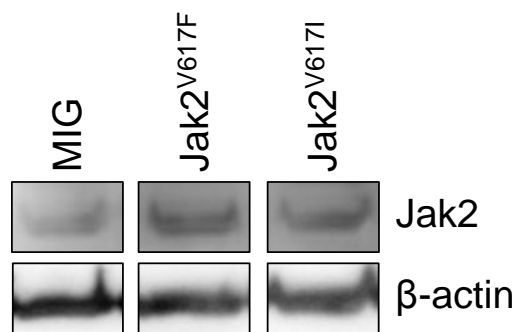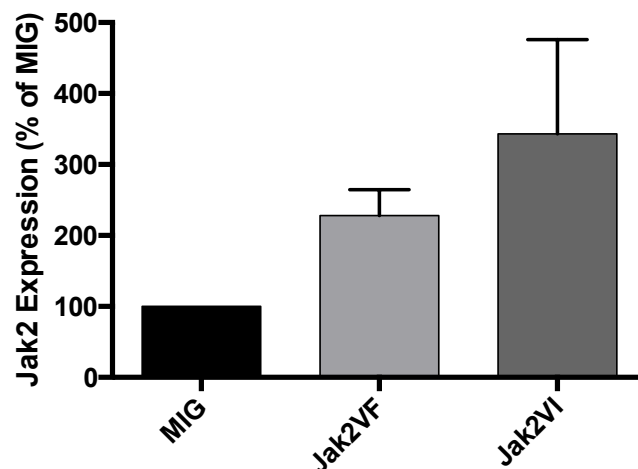

239

240

241

242 **Supplemental Figure 1.** JAK2 protein is equally overexpressed in JAK2<sup>V617I</sup> and JAK2<sup>V617F</sup>  
 243 mice. Spleen cells were lysed in 100 $\mu$ l RIPA buffer (Thermo Scientific) with protease  
 244 inhibitor cocktail and phosphatase inhibitor cocktail 2 (Sigma-Aldrich). Equal amounts of  
 245 protein were fractionated on a 14% acrylamide resolving gel overlaid with a 4% stacking gel  
 and transferred to polyvinylidene difluoride (PVDF) membranes. Membranes were probed  
 with Jak2(EPR108-2 Abcam) and  $\beta$ -actin (Abcam) (left). Amount of protein was quantified  
 using ImageJ software (right).

246

247

248

249

250

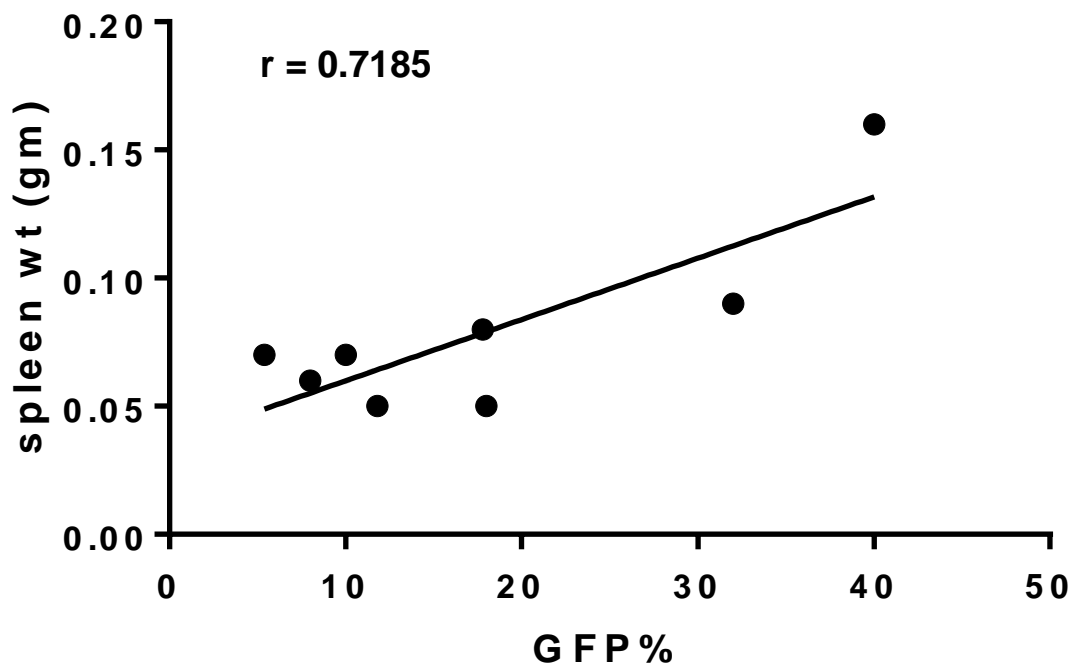

251

252

253 **Supplemental Figure 2.** Spleen weight in *JAK2<sup>V617I</sup>* mice correlates with the percentage of GFP<sup>+</sup>  
254 cells. Mice with a higher percentage of GFP<sup>+</sup> cells have larger spleens.

255
